# Supplementary material for: Effectiveness of home-based exercise for functional rehabilitation in older adults after hip fracture surgery: A systematic review and meta-analysis of randomized controlled trials
Source: PubMed Central journal article supplement (PMC11658508; doi:10.1371/journal.pone.0315707), 2024-12-19
Supplement: pone.0315707.s013.pdf [file pone.0315707.s013.pdf]

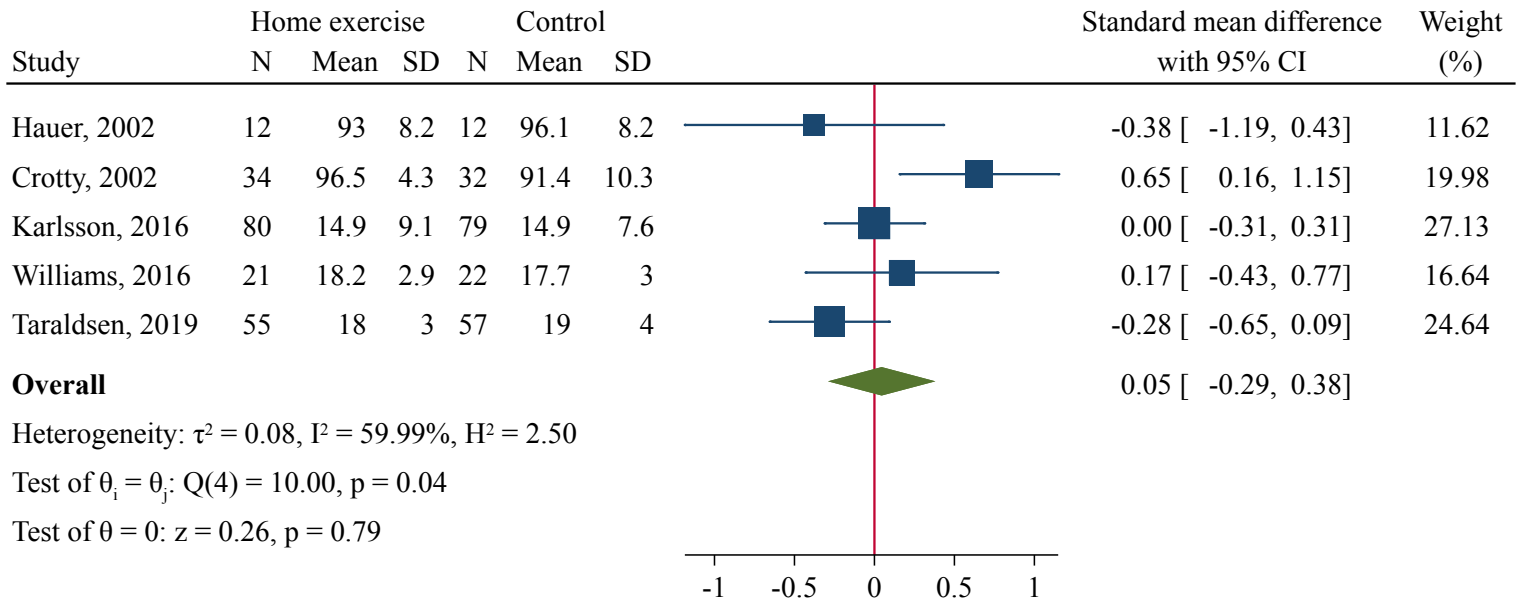

Random-effects DerSimonian-Laird model
